# Supplementary material
Source: MDPI journal article supplement (https://www.mdpi.com/2571-8789/8/2/40)
Supplement: s1 [file s1]

# SUPPLEMENTARY MATERIAL

## **Impact of biosolids-derived biochar on the remediation and ecotoxicity of diesel-impacted soil**

Charles Chinyere Dike<sup>ab\*</sup>, Christian Krohn<sup>ab</sup>, Leadin S. Khudur<sup>ab</sup>, Alka Rani Batra<sup>abc</sup>, Mac-Anthony Nnorom<sup>d</sup>, Aravind Surapaneni<sup>be</sup>, Kalpit Shah<sup>bf</sup>, Andrew S. Ball<sup>ab</sup>

<sup>a</sup>School of Science, RMIT University, Bundoora, Victoria 3083, Australia;

<sup>b</sup>ARC Training Centre for the Transformation of Australia's Biosolids Resource, RMIT University, Bundoora, Victoria 3083, Melbourne, Australia;

<sup>c</sup>Environment Protection Authority Victoria, Centre for Applied Sciences, Ernest Jones Drive, Macleod Victoria, 3085, Australia;

<sup>d</sup>Centre for Environmental Health and Engineering (CEHE), School of Sustainability, Civil and Environmental Engineering, University of Surrey, Guildford GU2 7XH, United Kingdom;

<sup>e</sup>South East Water, 101 Wells Street, Frankston, Victoria 3199, Australia;

<sup>f</sup>School of Engineering, RMIT University, Melbourne, Victoria 3000, Australia.

\*Corresponding author's email address: [charles.dike@student.rmit.edu.au](mailto:charles.dike@student.rmit.edu.au)

### **Text S1: Soil Physicochemical Properties**

The physicochemical properties of the soil, namely, organic carbon, inorganic carbon, pH, electrical conductivity (EC), phosphate (PO<sub>4</sub>), and total N (TN), were determined at the beginning (week 0) and the end of incubation (week 24). Organic and inorganic C was assessed using RemScan technology (Zilek, South Australia, Australia) as described in Section 2.4. Soil (1 g) and Milli-Q water (20 ml) were agitated at 150 rpm for 90 min, followed by centrifugation at 9500 rpm for 5 min before analysis of other properties (pH, PO<sub>4</sub>, EC, and TN). pH and EC were determined using a pH meter (Hanna Instruments, Rhode Island, USA) and a LAQUAtwin-EC-11 compact conductivity meter (Horiba Scientific, Kyoto, Japan), respectively. Total N and PO<sub>4</sub> were determined using the persulfate and acid persulfate digestion methods of the Hach reagent kit, respectively (Hach, Colorado, USA).

### **Text S2: Quantification of total and alkane-degrading bacteria**

The primers used for the 16S rRNA gene were 341-F (5'CCTACGGGAGGCAGCAG3') and 518-R (5' ATTACCGCGGCTGCTGG3') [1], while *alkB*-f (5'AAYACIGCICAYGARCTIGGICAYAA3') and *alkB*-r (5' GCRTGRTGRTCIGARTGICGYTG3') were used for the *alkB* gene [2]. The 16S rRNA and *alkB* genes were amplified using the cycling conditions previously described in [3] and [4], respectively. Serial dilutions of cleaned PCR products for both genes, within 10<sup>-1</sup> to 10<sup>-6</sup> were used to prepare a standard curve [5]. Copy numbers were generated by correlating the Cycle Threshold value to the prepared standard curve [5]. Gene copies were reported as log<sub>10</sub> gene numbers g<sup>-1</sup> dry soil [6].

### **Text S3: Ecotoxicity Testing**

To prepare the aqueous extract of contaminated soil, a mixture of 1 g of 2 mm sieved air-dried soil and 9 ml of Milli-Q water was agitated in a shaker for 24 h at 140 rpm, followed by manual mixing [7]. The mixture was centrifuged twice to obtain a supernatant, which was used as the aqueous extract. The osmotic pressure was adjusted using a 22% NaCl solution, while 2% NaCl was used as the diluent [4]. The luminescence of the bacteria following exposure to the aqueous extract was measured using a Microtox® Model 500 Analyser (Modern Water Inc., Delaware,

USA). The effective concentration 50 (EC<sub>50</sub>) at 15 min was calculated and used for the ecotoxicity assessment.

#### Text S4: Kinetic Analysis

Kinetic graph and correlation analysis was carried out using Microsoft Excel (Microsoft, Washington, USA).

The bioremediation of hydrocarbon was fitted with First-order kinetics [8]. The equation is stated in (1)

$$C_t = C_0 \cdot \exp(-kt) \quad (1)$$

Where  $C_t$  is the concentration at the time  $t$  (mg/kg),  $C_0$  is the initial concentration (mg/kg),  $k$  is the first-order kinetic constant (day<sup>-1</sup>), and  $t$  is the time (day) [8].

The half-life (DT<sub>50</sub>) was calculated using (2) [9]

$$DT_{50} = \ln 2 / k \quad (2)$$

Where  $k$  is the first-order kinetic constant (day<sup>-1</sup>).

**Table S1: Properties of the biosolids-derived biochar used in this study**

| Properties                                          | Biochar        |
|-----------------------------------------------------|----------------|
| Surface area (m <sup>2</sup> /g) <sup>a</sup>       | 65.6           |
| Total pore volume (cm <sup>3</sup> /g) <sup>a</sup> | 0.071          |
| Average pore diameter (nm) <sup>a</sup>             | 3.82           |
| pH                                                  | 10.28 ± 0.17   |
| Electrical conductivity (μS/cm)                     | 606.00 ± 15.04 |
| Proximate analysis (wt% d.b)                        |                |
| Moisture content (%)                                | 0.76 ± 0.079   |
| Volatile matter (%)                                 | 4.036 ± 0.30   |
| Fixed carbon (%)                                    | 13.03 ± 1.67   |
| Ash content (%)                                     | 82.18 ± 2.05   |

With exception to (<sup>a</sup>), values are the mean of replicates, while the error bar represents the standard deviation of the mean.

**Table S2: Soil properties before and after remediation**

| Treatments    | PO <sub>4</sub> (mg/L) | C/N ratio     | pH           | Electrical conductivity (μS/cm) |
|---------------|------------------------|---------------|--------------|---------------------------------|
| Initial       | 0.74 ± 0.078           | 87.52 ± 16.42 | 7.19 ± 0.087 | 80.83 ± 3.75                    |
| B at week 24  | 1.06 ± 0.064           | 49.35 ± 12.62 | 7.36 ± 0.17  | 123.33 ± 3.21                   |
| BN at week 24 | 2.86 ± 0.078*          | 34.16 ± 3.44* | 8.79 ± 0.039 | 193.00 ± 0.87                   |
| C at week 24  | 0.99 ± 0.13            | 55.86 ± 12.95 | 7.20 ± 0.025 | 67.17 ± 2.52                    |

Values are the mean of replicates and the standard deviation of the mean. Initial: Diesel-contaminated soil at week 0; B at week 24: Diesel-contaminated soil + 5% (w/w) biochar at week 24; BN at week 24: Diesel-contaminated soil + 5% (w/w) biochar + 0.2 % NaN<sub>3</sub> at week 24; C at week 24: Diesel-contaminated soil (control) at week 24. Asterisk (\*) shows the C/N ratio and PO<sub>4</sub> differs at week 24 relative to week 0 at  $p < 0.05$  using one-way ANOVA with Tukey.

**Table S3: Time for treatments to achieve the EPA Victoria Fill material maximum concentration (1000 mg/kg), based on the kinetic analysis**

|    | Time (day) | TPH conc at that time (mg/kg) |
|----|------------|-------------------------------|
| B  | 999.61     | 993.3                         |
| BN | 799.69     | 993.3                         |
| C  | 1110.68    | 993.3                         |

The prediction was done using the Equation of the first-order kinetics  $C_t = C_0 \cdot \exp(-kt)$ , where  $C_t$  is the concentration at the time  $t$  (mg/kg),  $C_0$  is the initial concentration (mg/kg),  $k$  is the half-life ( $\text{day}^{-1}$ ), and  $t$  is the time (day) [8]. B: Diesel-contaminated soil + 5% (w/w) biochar; BN: Diesel-contaminated soil + 5% (w/w) biochar + 0.2 % NaN<sub>3</sub>; C: Diesel-contaminated soil (control).

**Table S4: Number of genera in B, BN, and C at different sampling times**

| Treatments | 0   | 2   | 4   | 7   | 13  | 24  |
|------------|-----|-----|-----|-----|-----|-----|
| B          | 281 | 209 | 143 | 132 | 115 | 158 |
| BN         | 281 | 252 | 139 | 111 | 80  | 100 |
| C          | 281 | 180 | 153 | 122 | 90  | 123 |

B: Diesel-contaminated soil + 5% (w/w) biochar; BN: Diesel-contaminated soil + 5% (w/w) biochar + 0.2 % NaN<sub>3</sub>; C: Diesel-contaminated soil (control).

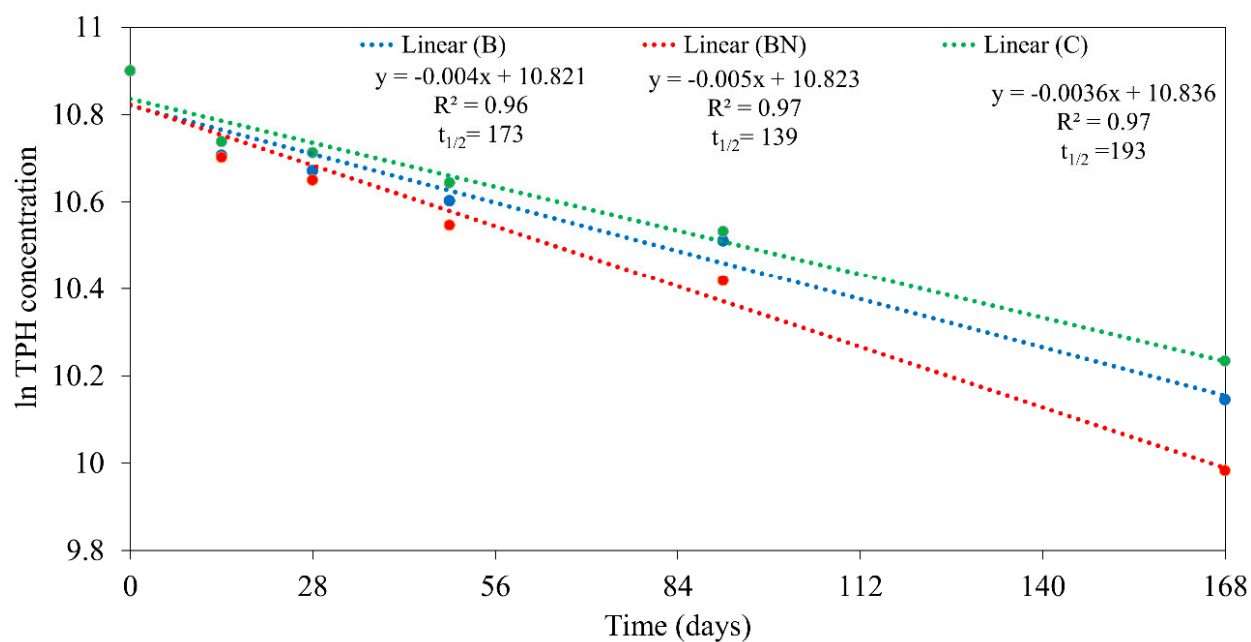

Figure S1: First-order kinetics curves fitting the degradation of B, BN, and the C treatments, with their respective equation, R<sup>2</sup>, and half-life (t<sub>1/2</sub>).

B: Diesel-contaminated soil + 5 % (w/w) biochar; BN: Diesel-contaminated soil + 5 % (w/w) biochar + 0.2 % NaN<sub>3</sub>; C: Diesel-contaminated soil (control).

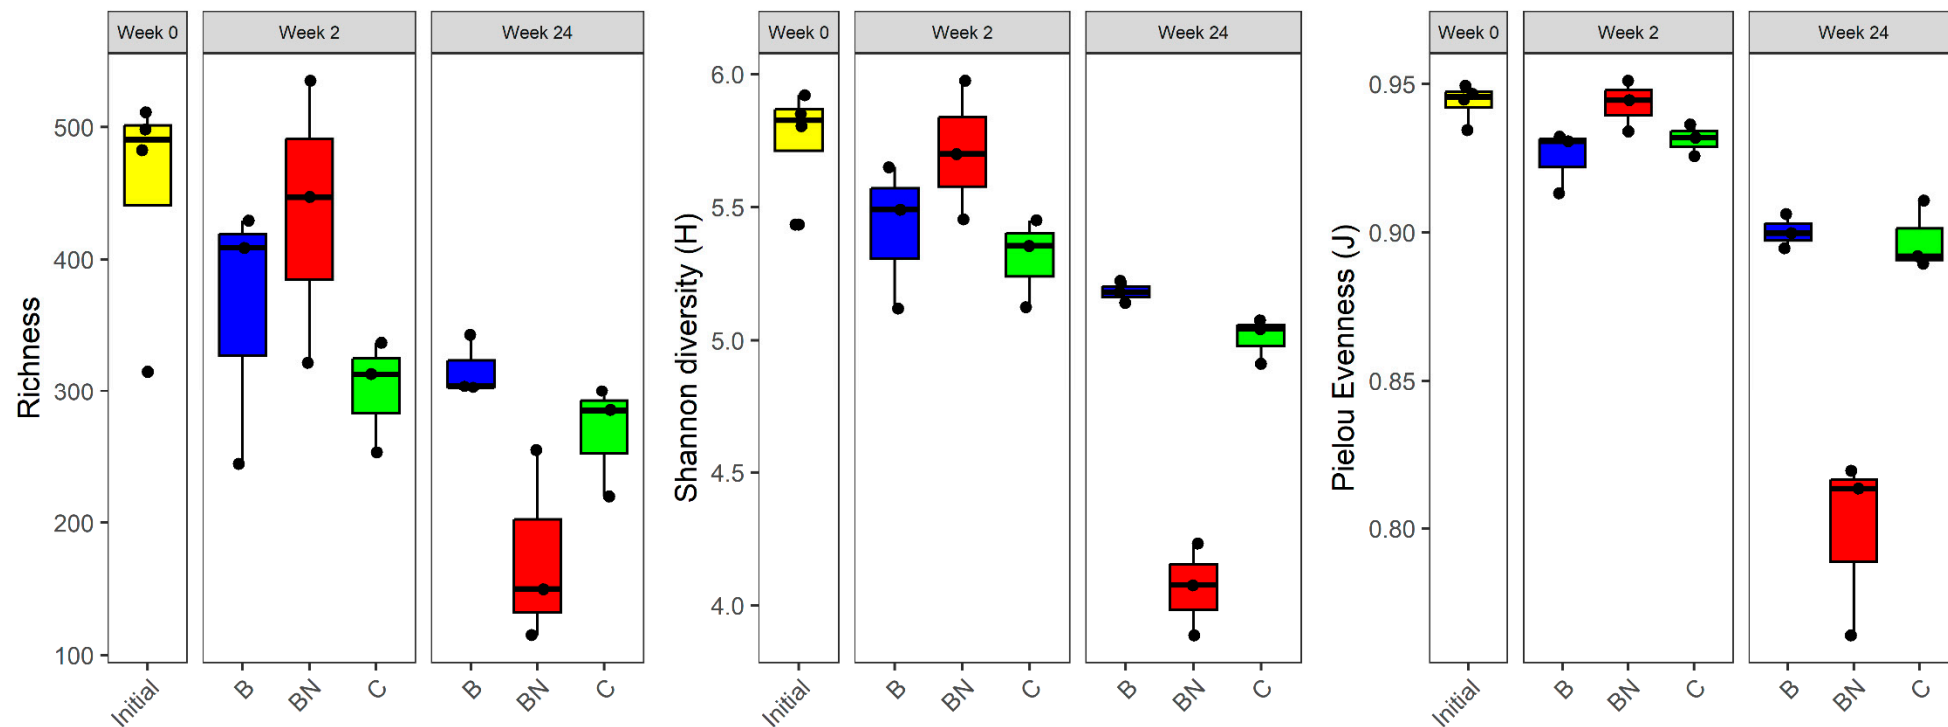

Figure S2: Alpha Diversity (Richness, Shannon diversity, Pielou Evenness) of the contaminated soil at week 0 as well as the different treatments (B, BN, and C) at weeks 2, and 24.

Initial: Diesel-contaminated soil at week 0; B: Diesel-contaminated soil + 5 %(w/w) biochar; BN: Diesel-contaminated soil + 5 %(w/w) biochar + 0.2 % NaN<sub>3</sub>; C: Diesel-contaminated soil (control).

a.)

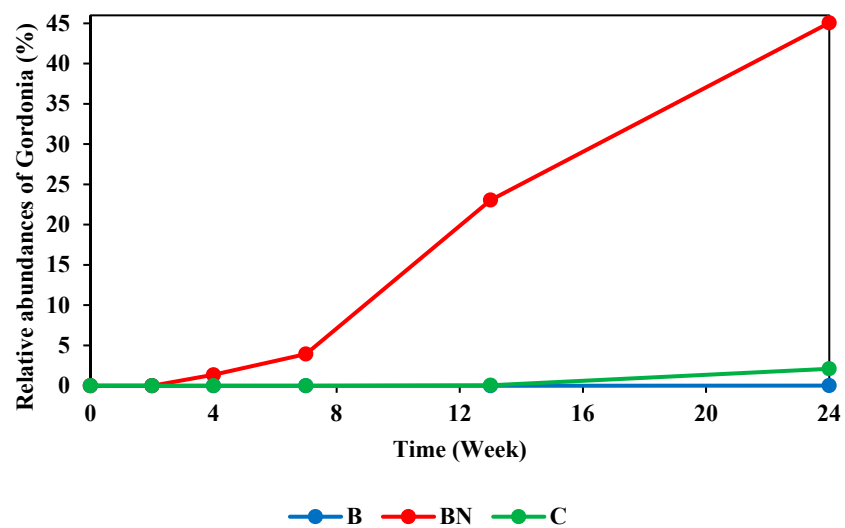

b.)

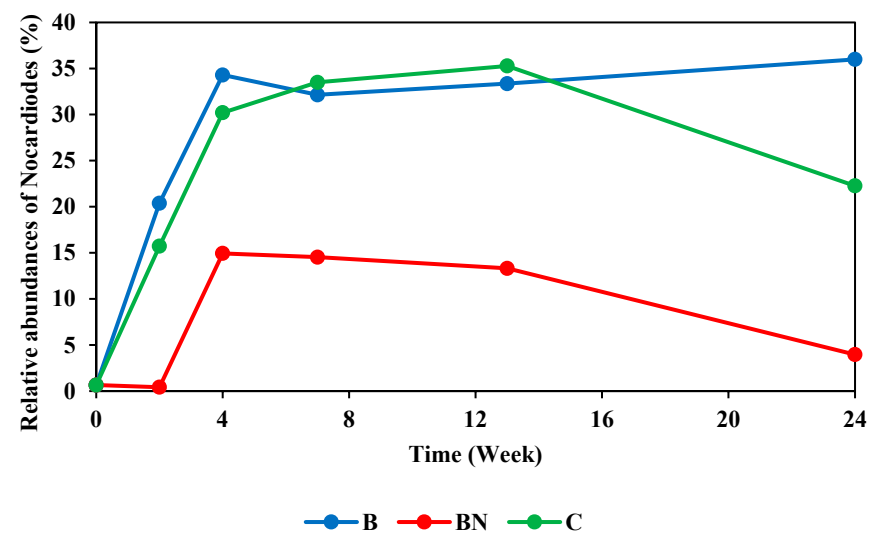

c.)

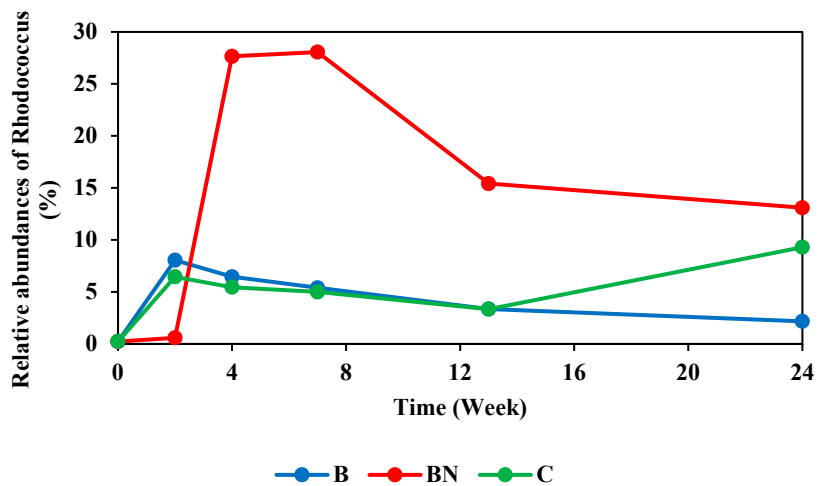

d.)

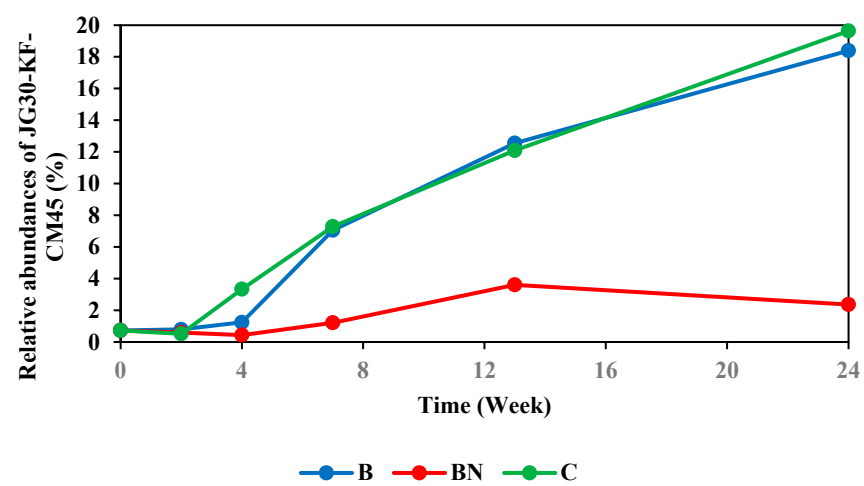

e.)

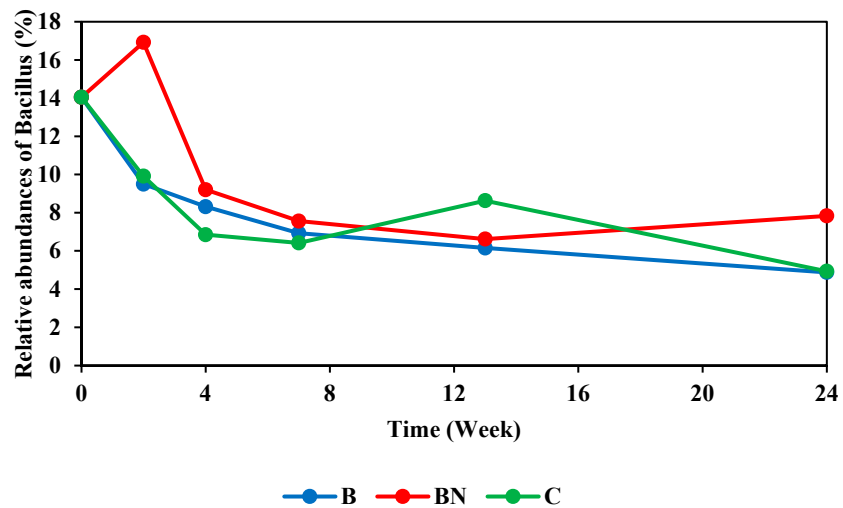

f.)

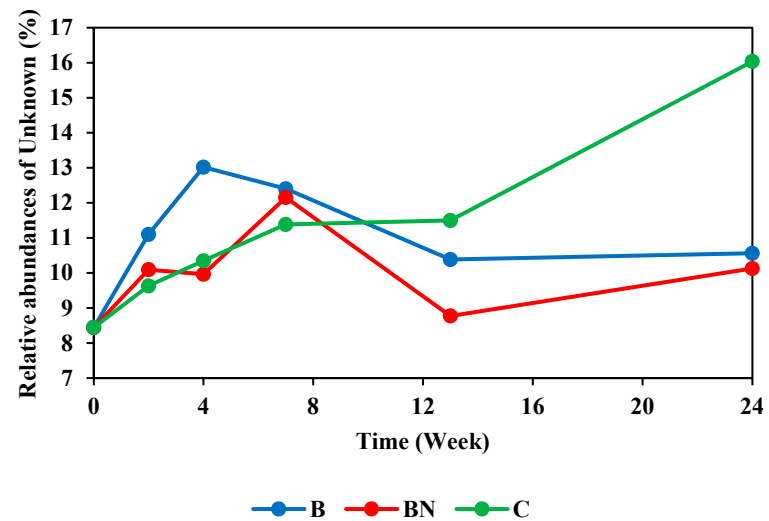

g.)

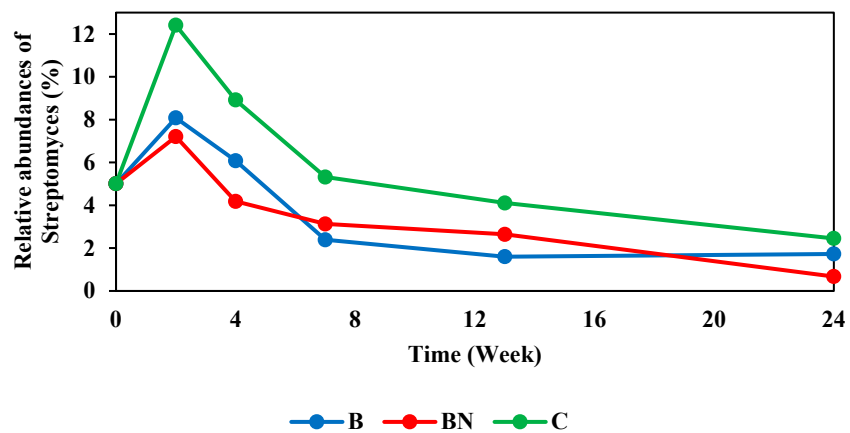

h.)

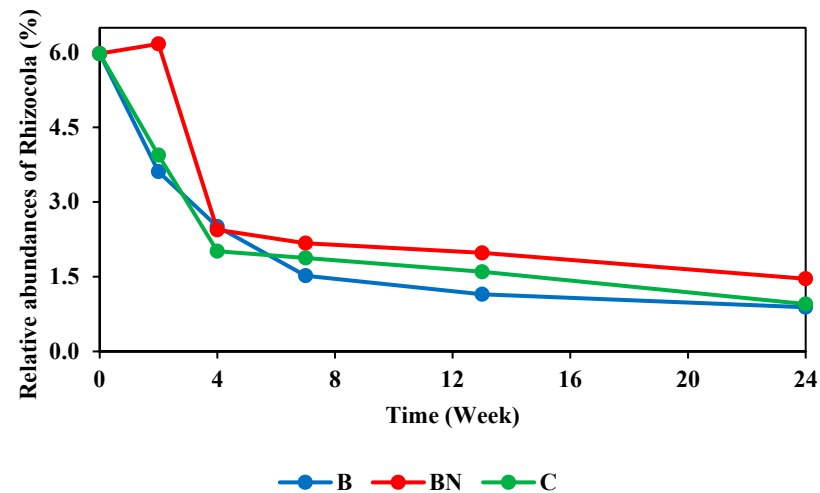



i.)

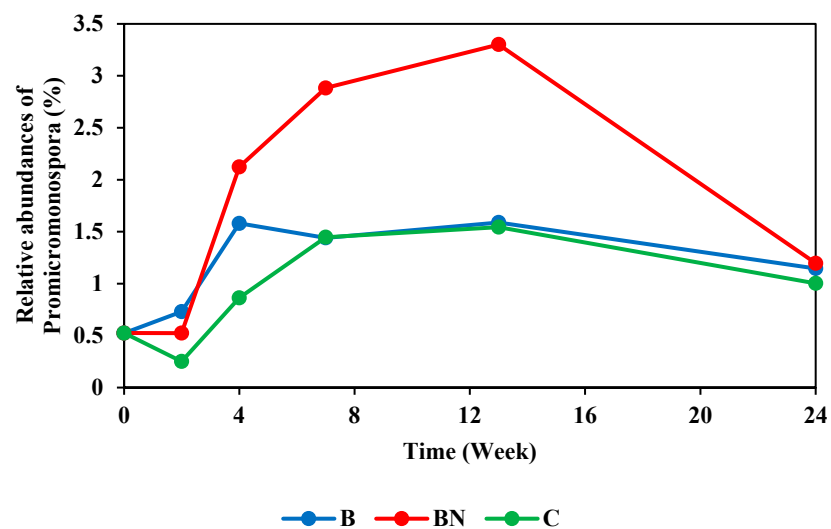

j.)

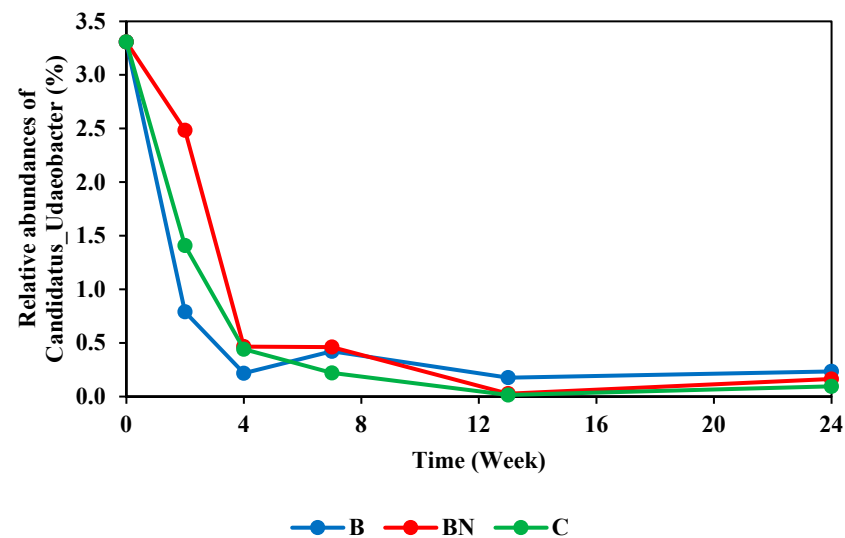

k.)

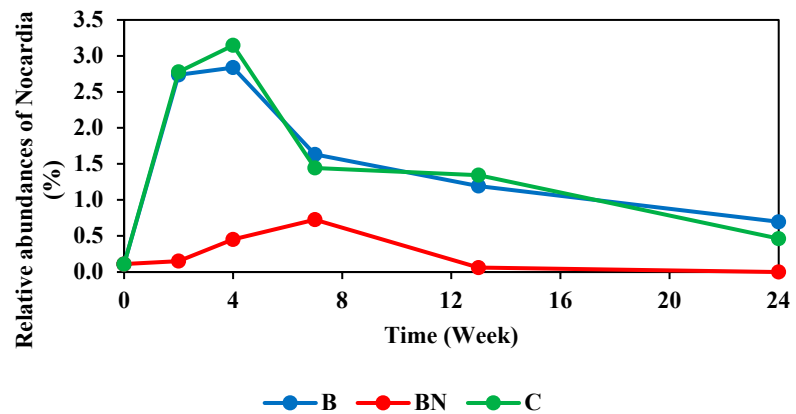

Figure S3: Relative abundances of top eleven genus for all treatments at different sampling times. a.): *Gordonia*; b.): *Norcardiodes*; c.): *Rhodococcus*; d.): JG30-KF-CM45; e.): *Bacillus*; f.): Unknown; g.): *Streptomyces*; h.): *Rhizocola*; i.): *Promicromonospora*; j.): *Candidatus\_Udaeobacter*; k.): *Nocardia*.

B: Diesel-contaminated soil + 5 %(w/w )biochar; BN: Diesel-contaminated soil + 5 % (w/w) biochar + 0.2 % NaN<sub>3</sub>; C: Diesel-contaminated soil (control).

(a.)

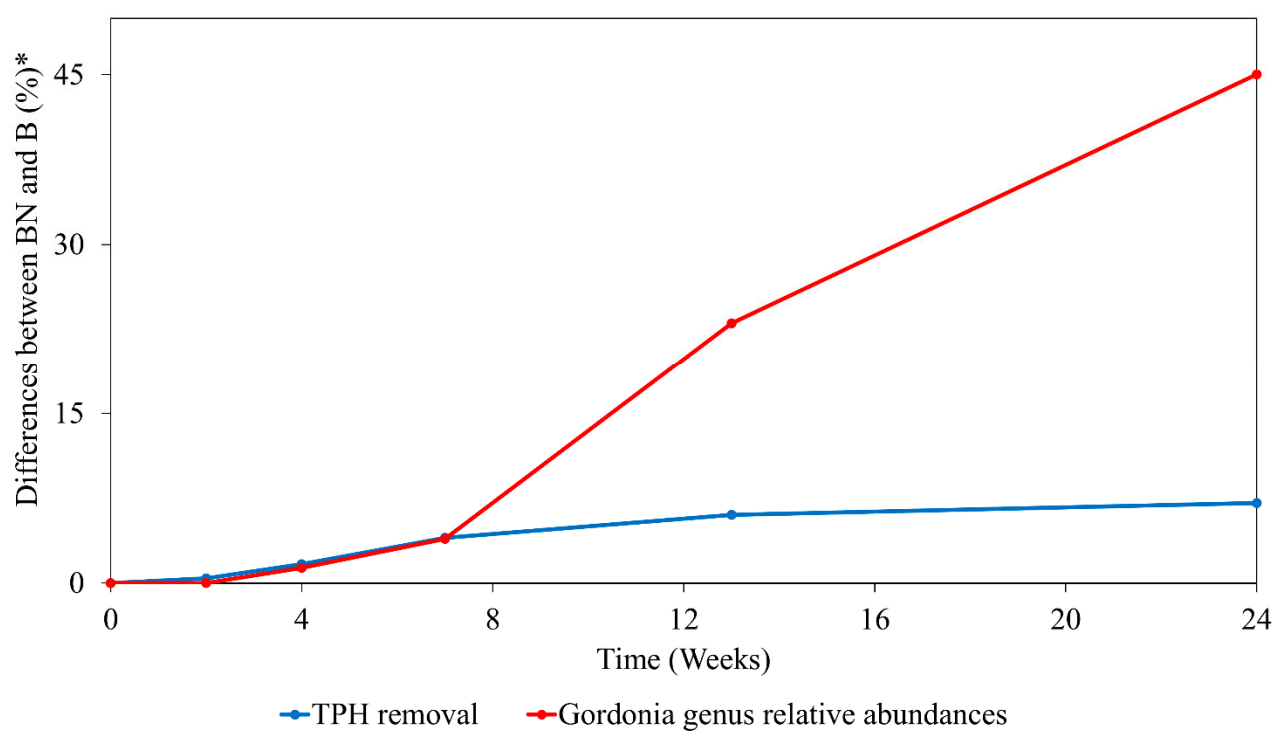

(b.)

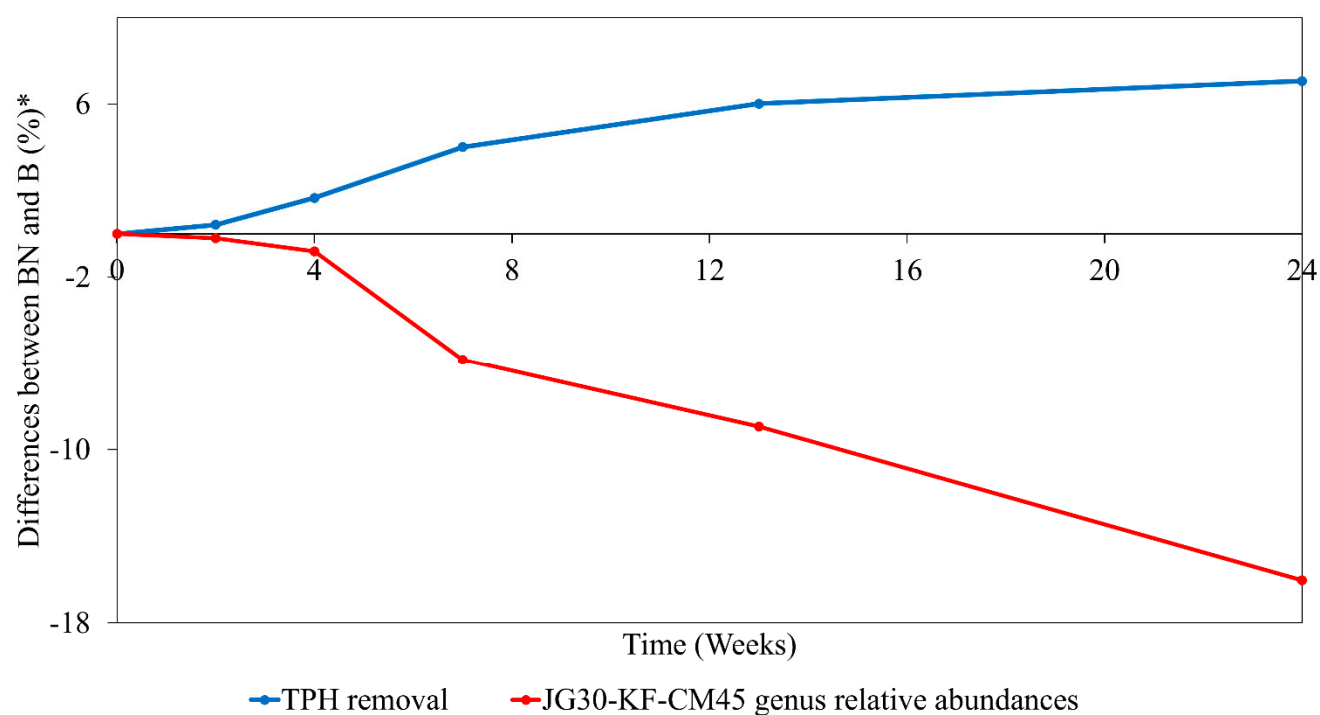

Figure S4: Differences between Treatment BN and B regarding TPH removal and relative abundances of a.) *Gordonia*, b.) *JG30-KF-CM45* genus.

\*: Difference= Relative abundance or percentage hydrocarbon removal of BN - Relative abundance or percentage hydrocarbon removal of B.

## References

- [1] H. Schafer, G. Muyzer, Denaturing gradient gel electrophoresis in marine microbial ecology, *Methods in Microbiology*, (2001) 425-468.
- [2] A. Pérez-de-Mora, M. Engel, M. Schloter, Abundance and diversity of n-alkane-degrading bacteria in a forest soil co-contaminated with hydrocarbons and metals: a molecular study on alkB homologous genes, *Microbial ecology*, 62 (2011) 959-972.
- [3] E. Shahsavari, A. Aburto-Medina, M. Taha, A.S. Ball, A quantitative PCR approach for quantification of functional genes involved in the degradation of polycyclic aromatic hydrocarbons in contaminated soils, *MethodsX*, 3 (2016) 205-211.
- [4] L.S. Khudur, D.B. Gleeson, M.H. Ryan, E. Shahsavari, N. Haleyr, D. Nugegoda, A.S. Ball, Implications of co-contamination with aged heavy metals and total petroleum hydrocarbons on natural attenuation and ecotoxicity in Australian soils, *Environmental Pollution*, 243 (2018) 94-102.
- [5] E. Shahsavari, E.M. Adetutu, P.A. Anderson, A.S. Ball, Plant residues—a low cost, effective bioremediation treatment for petrogenic hydrocarbon-contaminated soil, *Science of the Total Environment*, 443 (2013) 766-774.
- [6] E. Koshlaf, E. Shahsavari, N. Haleyr, A.M. Osborn, A.S. Ball, Impact of necrophytoremediation on petroleum hydrocarbon degradation, ecotoxicity and soil bacterial community composition in diesel-contaminated soil, *Environmental Science and Pollution Research*, 27 (2020) 31171–31183.
- [7] C.C. Dike, L.S. Khudur, I.G. Hakeem, A. Rani, E. Shahsavari, A. Surapaneni, K. Shah, A.S. Ball, Biosolids-derived biochar enhances the bioremediation of diesel-contaminated soil, *Journal of Environmental Chemical Engineering*, 10 (2022) 108633.
- [8] S.H. Kim, H. Woo, S. An, J. Chung, S. Lee, S. Lee, What determines the efficacy of landfarming for petroleum-contaminated soils: Significance of contaminant characteristics, *Chemosphere*, 290 (2022) 133392.
- [9] T. Sun, J. Miao, M. Saleem, H. Zhang, Y. Yang, Q. Zhang, Bacterial compatibility and immobilization with biochar improved tebuconazole degradation, soil microbiome composition and functioning, *Journal of Hazardous Materials*, 398 (2020) 122941.
